# Supplementary material
Source: PubMed Central journal article supplement (PMC4885656)
Supplement: supp_ciw193_ciw193supp.pdf [file supp_ciw193_ciw193supp.pdf]

**Supplemental table 1. Univariable and multivariable analysis of ST131-H30 as a predictor of clinical presentation, management, and outcomes.**

| Epidemiological variable |                             | Univariable analysis:<br>ST131-H30 <sup>b</sup> |                       |             | Multivariable analysis <sup>a</sup> |                       |             |                                        |             |                        |             |                     |             |                      |         |
|--------------------------|-----------------------------|-------------------------------------------------|-----------------------|-------------|-------------------------------------|-----------------------|-------------|----------------------------------------|-------------|------------------------|-------------|---------------------|-------------|----------------------|---------|
|                          |                             |                                                 |                       |             | ST131-H30                           |                       |             | LTCF <sup>a</sup> stay in<br>past year |             | Systemic<br>compromise |             | Local<br>compromise |             | Prior<br>antibiotics |         |
| Category                 | Specific variable           | O.R. <sup>c</sup>                               | 95% C.I. <sup>c</sup> | P value     | O.R. <sup>c</sup>                   | 95% C.I. <sup>c</sup> | P value     | O.R. <sup>c</sup>                      | P value     | O.R. <sup>c</sup>      | P value     | O.R. <sup>c</sup>   | P value     | O.R. <sup>c</sup>    | P value |
| Presentation             | Local manifestations        | 0.82                                            | 0.55-1.23             | .34         | 1.06                                | 0.68-1.65             | .93         | <b>3.34</b>                            | < .001      | <b>1.53</b>            | .06         | <b>1.59</b>         | .06         | <b>2.20</b>          | .001    |
|                          | Systemic manifestations     | 0.96                                            | 0.62-1.48             | .84         | 0.97                                | 0.60-1.55             | .89         | <b>3.30</b>                            | < .001      | <b>1.52</b>            | .07         | <b>1.59</b>         | .06         | <b>2.19</b>          | .001    |
|                          | Any clinical manifestation  | <b>0.59</b>                                     | <b>0.38-0.90</b>      | <b>.02</b>  | 0.87                                | 0.54-1.40             | .57         | <b>3.21</b>                            | < .001      | <b>1.50</b>            | .08         | <b>1.60</b>         | .06         | <b>2.16</b>          | .001    |
|                          | Suspected infection         | <b>0.56</b>                                     | <b>0.34-0.92</b>      | <b>.02</b>  | 0.81                                | 0.47-1.37             | .43         | <b>3.23</b>                            | < .001      | <b>1.51</b>            | .07         | <b>1.59</b>         | .06         | <b>2.13</b>          | .001    |
|                          | SIRS <sup>d</sup>           | <b>1.74</b>                                     | <b>1.05-2.91</b>      | <b>.03</b>  | 1.17                                | 0.66-2.07             | .58         | <b>3.23</b>                            | < .001      | <b>1.53</b>            | .06         | <b>1.56</b>         | .06         | <b>2.20</b>          | .001    |
|                          | Sepsis diagnosis            | 1.8                                             | 0.72-4.29             | .22         | 1.16                                | 0.43-3.08             | .77         | <b>3.20</b>                            | < .001      | <b>1.47</b>            | .09         | <b>1.62</b>         | .06         | <b>2.09</b>          | .002    |
|                          | Bacteremia                  | 0.37                                            | 0.05-2.73             | .31         | 0.41                                | 0.14-1.13             | .40         | <b>3.30</b>                            | < .001      | <b>1.54</b>            | .06         | <b>1.57</b>         | .07         | <b>2.18</b>          | .002    |
| Management               | Imaging                     | <b>1.79</b>                                     | <b>1.17-2.76</b>      | <b>.009</b> | 1.14                                | 0.70-1.86             | .58         | <b>3.23</b>                            | < .001      | <b>1.52</b>            | .07         | <b>1.52</b>         | .06         | <b>2.21</b>          | .001    |
|                          | Procedure                   | <b>1.99</b>                                     | <b>1.33-2.98</b>      | <b>.001</b> | 0.89                                | 0.41-1.73             | .63         | <b>3.29</b>                            | < .001      | <b>1.50</b>            | .06         | <b>1.60</b>         | .06         | <b>2.19</b>          | .001    |
|                          | Admit to hospital           | 2.28                                            | 1.36-3.84             | .002        | 0.73                                | (0.38-1.41)           | .34         | <b>3.42</b>                            | < .001      |                        |             | <b>1.64</b>         | .049        | <b>2.10</b>          | .002    |
|                          | Antibiotic therapy          | <b>0.39</b>                                     | <b>0.26-0.59</b>      | < .001      | <b>0.47</b>                         | <b>0.31-0.72</b>      | <b>.001</b> | <b>3.25</b>                            | < .001      |                        |             | <b>1.60</b>         | .06         | <b>2.08</b>          | .002    |
| Outcome                  | Resistant to antibiotic     | <b>2.76</b>                                     | <b>1.61-4.72</b>      | < .001      | <b>2.42</b>                         | <b>1.35-4.37</b>      | <b>.003</b> | <b>3.15</b>                            | .001        | <b>1.57</b>            | .048        | <b>1.53</b>         | .09         | <b>2.66</b>          | .001    |
|                          | Clinical persistence        | <b>3.17</b>                                     | <b>1.82-5.52</b>      | < .001      | <b>3.47</b>                         | <b>1.89-6.37</b>      | < .001      | <b>3.89</b>                            | < .001      |                        |             |                     |             | <b>2.03</b>          | .004    |
|                          | Microbiological persistence | <b>5.54</b>                                     | <b>3.11-9.98</b>      | < .001      | <b>4.46</b>                         | <b>2.38-8.38</b>      | < .001      | <b>3.70</b>                            | < .001      | <b>1.56</b>            | .06         | <b>1.59</b>         | .07         | <b>1.97</b>          | .005    |
|                          | Clinical recurrence         | 1.59                                            | 0.60-4.14             | .36         | 1.34                                | 0.48-3.77             | .58         | <b>3.41</b>                            | < .001      | <b>1.51</b>            | .08         | <b>1.70</b>         | .04         | <b>2.06</b>          | .002    |
|                          | Microbiological recurrence  | 0.83                                            | 0.19-3.57             | .80         | 0.80                                | 0.17-3.69             | .78         | <b>3.40</b>                            | < .001      | <b>1.50</b>            | .08         | <b>1.60</b>         | .07         | <b>2.21</b>          | .001    |
|                          | Later sepsis diagnosis      | <b>2.70</b>                                     | <b>1.07-6.81</b>      | <b>.04</b>  | 0.99                                | 0.35-2.78             | .98         | <b>3.29</b>                            | < .001      | <b>1.53</b>            | .06         | <b>1.58</b>         | .07         | <b>2.18</b>          | .001    |
|                          | Outpatient visit(s)         | <b>1.54</b>                                     | <b>1.03-2.30</b>      | <b>.03</b>  | 1.24                                | 0.79-1.93             | .34         | <b>3.52</b>                            | < .001      | <b>1.46</b>            | .099        | <b>1.58</b>         | .07         | <b>2.15</b>          | .001    |
|                          | Escalation in level of care | 1.57                                            | 0.60-4.13             | .36         | 0.64                                | 0.22-1.82             | .40         | <b>3.36</b>                            | < .001      | <b>1.59</b>            | .07         | <b>1.59</b>         | .06         | <b>2.23</b>          | .001    |
|                          | Admit to hospital           | <b>3.63</b>                                     | <b>1.94-6.77</b>      | < .001      | <b>2.68</b>                         | <b>1.35-5.33</b>      | <b>.005</b> | <b>3.34</b>                            | < .001      |                        |             | <b>1.68</b>         | .04         | <b>2.18</b>          | .001    |
|                          | New antibiotics             | <b>2.62</b>                                     | <b>1.73-3.96</b>      | < .001      | <b>2.04</b>                         | <b>1.32-3.16</b>      | <b>.001</b> | <b>3.45</b>                            | < .001      | <b>1.52</b>            | .07         |                     |             | <b>2.13</b>          | .001    |
|                          | Imaging                     | <b>2.01</b>                                     | <b>1.33-3.02</b>      | <b>.001</b> | 1.27                                | 0.81-2.01             | .30         | <b>3.28</b>                            | < .001      | <b>1.49</b>            | .08         | <b>1.57</b>         | .07         | <b>2.18</b>          | .001    |
|                          | Procedure                   | <b>2.03</b>                                     | <b>1.35-3.05</b>      | <b>.001</b> | 1.30                                | 0.75-2.24             | .35         | <b>3.33</b>                            | < .001      | <b>1.50</b>            | .08         | <b>1.56</b>         | .08         | <b>2.19</b>          | .001    |
|                          | New infection               | <b>2.82</b>                                     | <b>1.72-4.62</b>      | < .001      | <b>1.73</b>                         | <b>1.01-3.00</b>      | <b>.047</b> | <b>3.21</b>                            | < .001      | <b>1.51</b>            | .07         | <b>1.56</b>         | .08         | <b>2.16</b>          | .001    |
| Other complication       | <b>1.95</b>                 | <b>1.26-3.03</b>                                | <b>.003</b>           | 1.28        | 0.78-2.07                           | .34                   | <b>3.30</b> | < .001                                 | <b>1.49</b> | .08                    | <b>1.57</b> | .07                 | <b>2.19</b> | .001                 |         |

<sup>a</sup>Candidate predictor variables that were used in each multivariable model included: H30, age, male, hospital stay in past year, long-term care facility (LTCF) stay in past year, systemic compromise, local compromise, hospital (Harborview King County Medical Center, University of Washington Medical Center, or Minneapolis Veterans Affairs Medical Center [VA]), and recent antibiotic (past 30 days). Results are shown in bold where P < .10. Multivariable results for predictor variables other than ST131-H30 are shown only where P < .10. (No model yielded P < .10 for age, male, hospital stay in past year, or hospital.)

<sup>b</sup>Results are shown in bold where P < .10.

<sup>c</sup>O.R., odds ratio. C.I., 95% confidence interval.

<sup>d</sup>SIRS: systemic inflammatory response syndrome. Other variables are defined in Table 1.
